# Supplementary material
Source: PubMed Central journal article supplement (PMC3294497)
Supplement: supp_78.5.1563_AEM-AEM07335-11-s01.pdf [file supp_78.5.1563_AEM-AEM07335-11-s01.pdf]

## Supplementary Figure 1

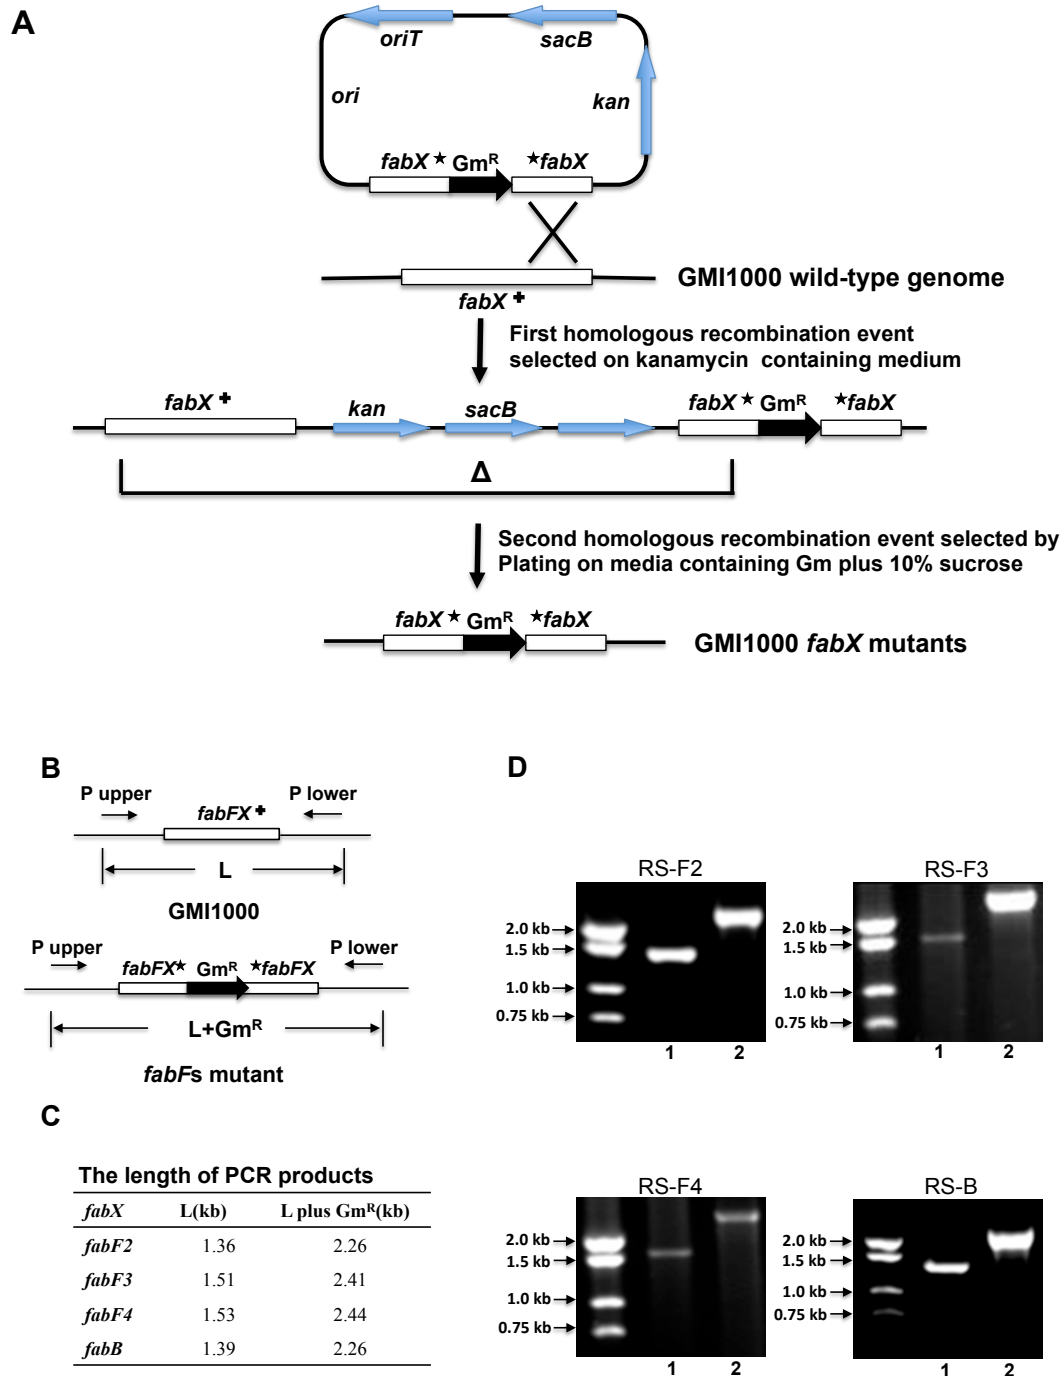

**SFig. 1. Identification of *R. solanacearum* *fabFs* and *fabB* insertion mutants**

*Panel A.* Strategy for isolation of *R. solanacearum* *fabX* mutation via *sacB*-counter selected gene replacement. *Panel B.* Genetic organization of the *fabXs* region in wild-type GMI1000 and the *fabXs::Gm<sup>R</sup>* insertion mutants. *Panel C.* The expected length of PCR products amplified from wild-type *fabXs* or *fabXs::Gm<sup>R</sup>* insertion

mutants genomic DNA using primers: P upper and P lower. *Panel D.* The PCR analysis of genomic DNA from the mutation strain Rs-F2, Rs-F3, Rs-F4 and Rs-B. Abbreviations: *kan*, kanamycin-resistant gene; Gm, gentamicin-resistant marker; *ori*, pMB1 origin of origin of replication; *oriT*, origin of transfer; *sacB*, levansucrase-encoding gene; *fabX*, 3-ketoacyl-acyl-carrier-protein synthase homologues encoding genes, including *fabF2*, *fabF3*, *fabF4* and *fabB*.
