# Supplementary material
Source: PubMed Central journal article supplement (PMC3294497)
Supplement: supp_78.5.1563_AEM-AEM07335-11-s02.pdf [file supp_78.5.1563_AEM-AEM07335-11-s02.pdf]

## Supplementary Figure 2

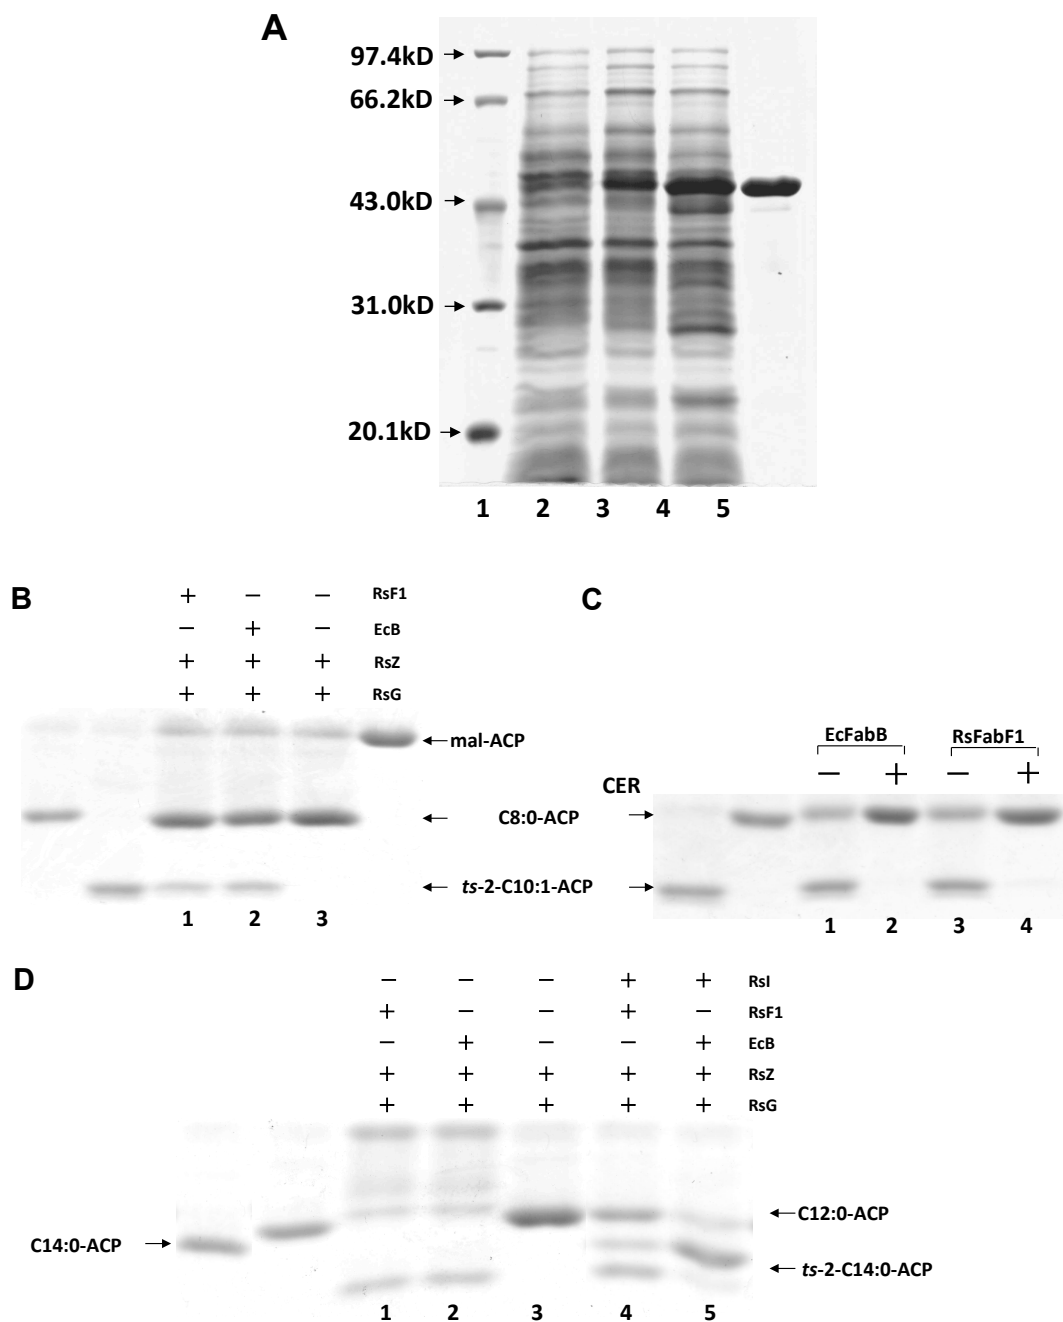

**SFig. 2. Purification of *R. solanacearum* GMI1000 FabF1 and related proteins in *E. coli* and enzymatic characterization of *R. solanacearum* GMI1000 FabF1 in *vitro***

*Panel A.* Expression and purification of *R. solanacearum* GMI1000 FabF1 from *E. coli* strain BL21 (DE3) under induction by IPTG. Lane 1, molecular mass markers; lane 2, proteins expressed in the presence of vector pET28b; lane 3, proteins

expressed in the presence of plasmid pCEF1 (*Rsfabf1*) under no induction; lane 4, proteins expressed in the presence of plasmid pCEF1 (*Rsfabf1*) under induction; lane 5, RsFabF1 purified by native nickel-chelate chromatography. *Panel B.* The reaction mixture for assays of the elongation of C8:0-ACP to C10:0-ACP by RsFabF1 or EcFabB contained 0.1 M sodium phosphate (pH7.0), 1mM  $\beta$ -mercaptoethanol, 100 $\mu$ M NADPH, 20 $\mu$ l octanoyl-ACP, 20 $\mu$ l malonyl-ACP, 2 $\mu$ g RsFabG, 2 $\mu$ g RsFabZ, and 2 $\mu$ g RsFabF1 or EcFabB. Malonyl-ACP and octanoyl-ACP were synthesized as described in Materials and Methods. *Panel C.* Effect of cerulenin (40  $\mu$ M) on the activities of RsFabF1 or EcFabB. The appropriate amounts of cerulenin solution were added to 1.5-ml tubes, and the solvent was evaporated, and RsFabF1 or EcFabB was added and the mixture was incubated for 10 min first, and then the others contents were mixed with RsFabF1 or EcFabB. *Panel D.* For assays of the elongation of C12:0-ACP to C14:0-ACP, the reaction mixtures contained dodecanoyl-ACP replaced the octanoyl-ACP, and the mixtures was added RsFabI to convert *trans*-2-tetradecenoyl-ACP to tetradecanoyl-ACP. The designations are: EcB, EcFabB; RsF1, RsFabF1; RsZ, RsFabZ; RsG, FabG; RsI, RaFabI; CER, Cerulenin; mal-ACP, malonyl-ACP; C8:0-ACP, octanoyl-ACP; *ts*-2-C10:1-ACP, *trans*-2-decenoyl-ACP, C12:0-ACP, dodecanoyl-ACP; C14:0-ACP, tetradecanoyl-ACP; *ts*-2-C14:0-ACP, *trans*-2-tetradecenoyl-ACP.
